# Supplementary material for: Stable seawater oxidation with a self-healing oxygen-evolving catalyst
Source: Royal Society of Chemistry journal article supplement (doi:10.1039/d3qi00470h), 2023-01-01
Supplement: d3qi00470h1.pdf [file d3qi00470h1.pdf]

## Supporting Information for

### Stable seawater oxidation with a self-healing oxygen-evolving catalyst

Xiaojian Zhang,<sup>a,b</sup> Chao Feng,<sup>b</sup> Zeyu Fan,<sup>b</sup> Beibei Zhang,<sup>b</sup> Yequan Xiao,<sup>c</sup> Andraž Mavrič,<sup>d</sup> Nadiia Pastukhova,<sup>d</sup> Matjaz Valant,<sup>d</sup> Yi-Fan Han,<sup>\*a</sup> and Yanbo Li<sup>\*b</sup>

<sup>a</sup>Engineering Research Center of Advanced Functional Material Manufacturing of Ministry of Education, Zhengzhou University, Zhengzhou 450001, China. \*Email: yifanhan@ecust.edu.cn

<sup>b</sup>Institute of Fundamental and Frontier Sciences, University of Electronic Science and Technology of China, Chengdu 610054, China. \*Email: yanboli@uestc.edu.cn

<sup>c</sup>School of Physics and Optoelectronics, Xiangtan University, Xiangtan 411105, China.

<sup>d</sup>University of Nova Gorica, Materials Research Laboratory, Vipavska 13, SI-5000 Nova Gorica, Slovenia.

#### Materials and Methods

**Chemicals.** Fe (II) sulfate heptahydrate ( $\text{FeSO}_4 \cdot 7\text{H}_2\text{O}$ , 99.95%; Aladdin); Co (II) nitrate hexahydrate ( $\text{Co}(\text{NO}_3)_2 \cdot 6\text{H}_2\text{O}$ , 99.99%; Aladdin); Ni (II) nitrate hexahydrate ( $\text{NiSO}_4 \cdot 6\text{H}_2\text{O}$ , 99.99%; Aladdin); Hydrochloric acid (HCl, 37%; RCI Labscan Limited), potassium hydroxide (KOH, 95%; Aladdin), boric acid ( $\text{H}_3\text{BO}_3$ , 99.5%; Aladdin), Ni foam (thickness, 2 mm), and Argon (Ar, 99.999%) were used as received. Deionized (DI) water was used for the preparation of all aqueous solutions. The artificial seawater was prepared according to the Standard Practice for Preparation of Substitute Ocean Water (ASTM D1141-98). Natural seawater (pH~7.3) was collected from the silver beach in Lushan, Weihai, Shandong, China (36.494° N, 121.424° E).

**Synthesis of NiCoFe-B<sub>i</sub> and NiCo-B<sub>i</sub> catalysts on NF.** The NiCoFe-B<sub>i</sub> catalyst was deposited on the NF substrate via an electrodeposition process. Before the synthesis, NF substrates (0.5 cm<sup>2</sup>) were sequentially cleaned with 6 M hydrochloric acid, deionized water, acetone, and anhydrous ethanol by ultrasonication for 15 min each to remove the possible surface oxide layer and ensure the clean surface, then dried under a flow of nitrogen gas. Next, the NiCoFe-B<sub>i</sub> catalyst was electrodeposited onto NF substrates in potassium borate buffer (pH 10) containing Ni(II), Co(II), and Fe(II) ions. Potassium borate ( $\text{K}_2\text{B}_4\text{O}_5(\text{OH})_4$ , KB<sub>i</sub>) buffer was prepared by mixing 1 M boric acid with 0.6 M potassium hydroxide. Prior to electrodeposition, the buffer solution is continuously fed with Ar gas to remove the oxygen for at least 10 minutes. Then, 0.5 mM cobalt(II) nitrate, 2 mM nickel(II) sulfate, and 0.8 mM iron(II) sulfate were sequentially added to the KB<sub>i</sub> buffer solution under magnetic stirring. The solution was under continuous Ar bubbling and magnetic stirring during electrodeposition. Electrodeposition was conducted with a potentiostat (BioLogic SP-200) in

a three-electrode configuration using Ag/AgCl as the reference electrode and a Pt wire as the counter electrode. The NiCoFe-B<sub>i</sub> catalyst was deposited on NF substrate under a constant voltage of 0.85V for 30 min. After electrodeposition, the electrode was washed thoroughly with deionized water before the OER test. NiCo-B<sub>i</sub> catalyst was deposited onto NF substrates in a similar way to that used for NiCoFe-B<sub>i</sub> deposition except that Fe(II) ions were not added.

**Preparation of artificial seawater.** Firstly, 396.858 g MgCl<sub>2</sub>·6H<sub>2</sub>O, 41.815 g CaCl<sub>2</sub> and 1.484 g SrCl<sub>2</sub>·6H<sub>2</sub>O were dissolved in DI water and diluted to a total volume of 700 mL. The solution was stored in well stoppered glass containers as the Stock Solution No. 1.

Then, 48.671 g KCl, 14.140 g NaHCO<sub>3</sub>, 7.112 g KBr, 1.911 g H<sub>3</sub>BO<sub>3</sub>, and 0.217 g NaF were dissolved in DI water and diluted to a total volume of 700 mL. The solution was stored in well stoppered glass containers as the Stock Solution No. 2.

To prepare 1.0 L of artificial seawater, 24.5586 g NaCl and 4.1354 g Na<sub>2</sub>SO<sub>4</sub> were dissolved in 800 mL of DI water. Then 20 mL of Stock Solution No.1 and 10 mL of Stock Solution No.2 were sequentially added to the above 800 mL of mixed solution under magnetic stirring. Finally, the artificial seawater (pH~7.65) was obtained by diluting the above solution into 1L.

**Alkaline treatment of artificial and natural seawater.** The alkaline treatment of seawater at pH 14.95 was achieved by adding 10 M KOH into the seawater. To thoroughly remove Mg<sup>2+</sup> and Ca<sup>2+</sup>, the 10 M KOH was added sequentially into 1 L artificial seawater in three batches. After each addition, the solution was stirred continuously for 1h under magnetic stirring and then left to stand for 24 h to obtain a supernatant, which was then filtered using with a 5-μm capsule filter. Finally, to compensate for the possible loss of intercalated borate ions in the NiCoFe-B<sub>i</sub> catalyst, 1 M H<sub>3</sub>BO<sub>3</sub> was added into the solution to form 0.25 M K<sub>2</sub>B<sub>4</sub>O<sub>5</sub>(OH)<sub>4</sub> (KB<sub>i</sub>) in the seawater. The alkaline treatment of seawater at pH 14 and pH 14.6 were prepared in a similar way, except that 2 M and 5 M KOH were used, respectively.

**Materials Characterization.** The SEM and EDS of the catalysts were characterized using Phenom Pharos G2. A cross-sectional sample was prepared by mechanical polishing and finalized using ion beam polisher (JEOL IB-09010CP). The cross-sectional STEM-EDS mapping and line scan were obtained using JEOL JSM 7001 TTLS (FEG) equipped with an EDS detector (Oxford Instruments). After alkaline treatment at pH 14.95, the precipitates were characterized by X-Ray Diffraction (XRD, Thermo Scientific ARL™ EQUINOX 1000) with Cu-Kα radiation, and the remaining concentrations of Mg<sup>2+</sup> and Ca<sup>2+</sup> in seawater were determined using ICP-optical emission spectrometry (ICP-OES; iCAP 7400DUO, Thermo Fisher Scientific). The surface chemical composition and valence states of the as-prepared and post-OER electrodes were analyzed by X-ray

photoelectron spectroscopy (XPS, Specs PHOIBOS 150) using Al-K $\alpha$  radiation. The binding energy was calibrated by setting the binding energy of the hydrocarbon C 1s feature to 284.8 eV. Spectrum analysis was performed with the XPSPEAK software and the Thermo Scientific™ Avantage software.

**Electrochemical Characterizations.** The electrochemical tests were performed on a potentiostat (CHI 660E, CH Instruments, Inc.) in an H-cell in a three-electrode configuration. A Pt wire and a double-salt-bridge Hg/HgO electrode were used as the counter and reference electrodes, respectively. The anode chamber and the cathode chamber of the H-cell were separated using an anion exchange membrane (Sustainion X37-50, 4.9 cm<sup>2</sup>). The H-cell was integrated with a water jacket and the temperature of the electrolyte was maintained at 25 °C using a constant temperature water circulator. OER polarization curves of the catalysts were measured under an anodic scan at a rate of 10 mV s<sup>-1</sup> under magnetic stirring. The stability of the catalysts was tested under current densities of 100 or 500 mA cm<sup>-2</sup>. The potentials vs. Hg/HgO reference electrodes were converted into RHE following the Nernst equation ( $E_{\text{RHE}} = E_{\text{Hg/HgO}} + 0.0591 \times \text{pH} + 0.098$ ). The ohmic resistance ( $R_s$ ) for iR corrections was determined by electrochemical impedance spectroscopy (EIS). EIS was conducted at an overpotential of 300 mV from 0.01 Hz to 10000 Hz with an AC amplitude of 10 mV. The Tafel slope curves were plotted from the corresponding LSV curves with iR compensation. To calculate FE, we measured the generated gaseous product in the flow cell configuration. An air-tight electrochemical cell with a gas inlet and outlet was used for the GC (Shimadzu GC-2014) measurement. The FE was calculated by comparing the experimentally measured O<sub>2</sub> amount to the theoretically calculated value from the current. By plotting the capacitive current at 1.08 V vs. RHE against the scan rates, the double-layer capacitance ( $C_{\text{dl}}$ ) was obtained and then the ECSA was derived from the equation:  $\text{ECSA} = C_{\text{dl}}/C_s$ , in which  $C_s$  is the specific capacitance for a flat surface (40  $\mu\text{F cm}^{-2}$ ).

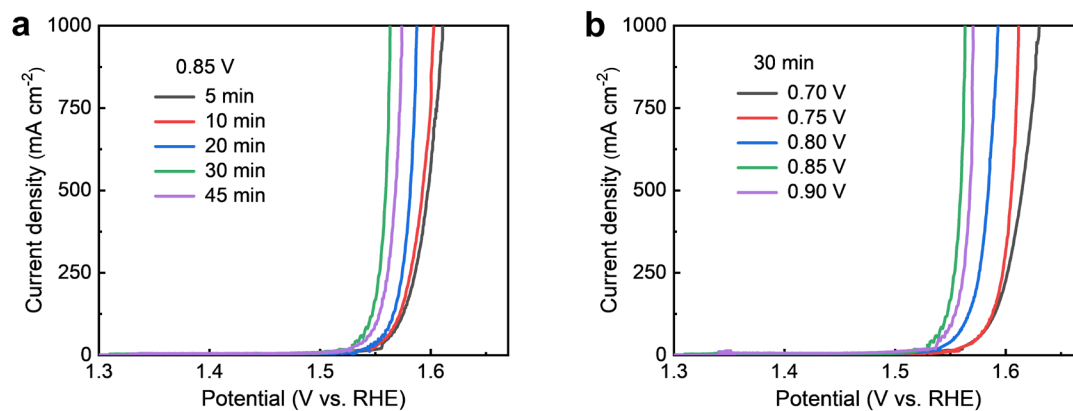

**Fig. S1.** The OER polarization curves of NiCoFe-Bi catalysts: (a) deposited at 0.85 V vs. Ag/AgCl for different electrodeposition times; (b) deposited at different applied potentials for 30 min. The curves were measured in alkaline artificial seawater (pH 14) with 0.05 mM Fe(II) ions at 10 mV s<sup>-1</sup> scan rate, with iR correction.

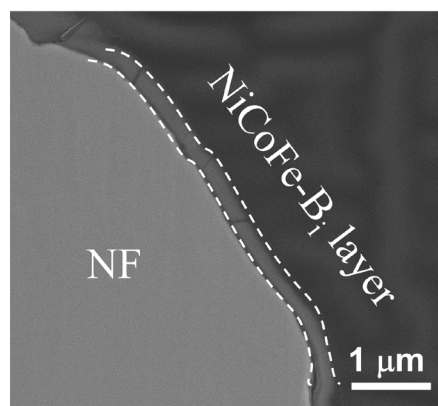

**Fig. S2.** The cross-sectional SEM image of NiCoFe-Bi catalyst on NF substrate.

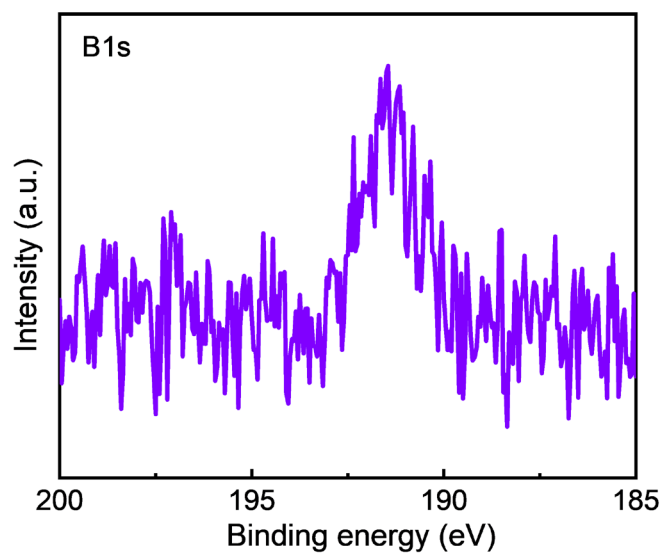

**Fig. S3.** Core-level XPS spectra of B 1s of the as-prepared NiCoFe-Bi catalyst.

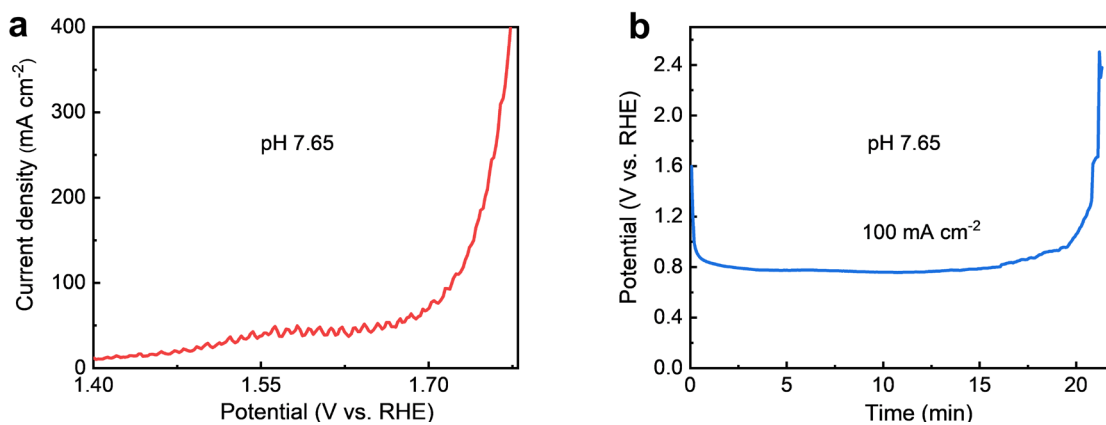

**Fig. S4.** OER performance of NiCoFe-Bi catalyst in artificial seawater at pH 7.65. (a) The LSV curve measured at  $10 \text{ mV s}^{-1}$  scan rate, without iR correction. (b) Chronoamperometry curve measured at  $100 \text{ mA cm}^{-2}$  for 20 min. Most likely the current is mainly derived from the electrochemical oxidation of the NF substrate until failure at 20 minutes.

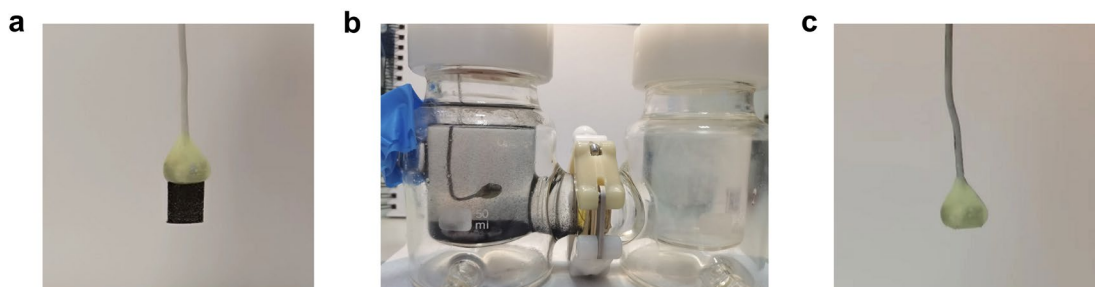

**Fig. S5.** Photographs of NiCoFe-Bi/NF electrode: (a) as-prepared; (b, c) after stability test at  $100 \text{ mA cm}^{-2}$  for 20 min in artificial seawater at pH 7.65.

The electrode corrodes rapidly in untreated seawater likely due to the aggressive chloride anions in seawater, which corrode the catalyst and substrate through a metal chloride-hydroxide formation mechanism<sup>1,2</sup> (M represents metal atoms):

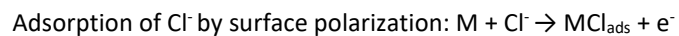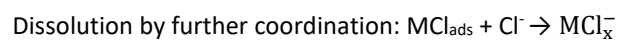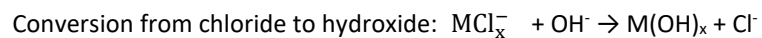



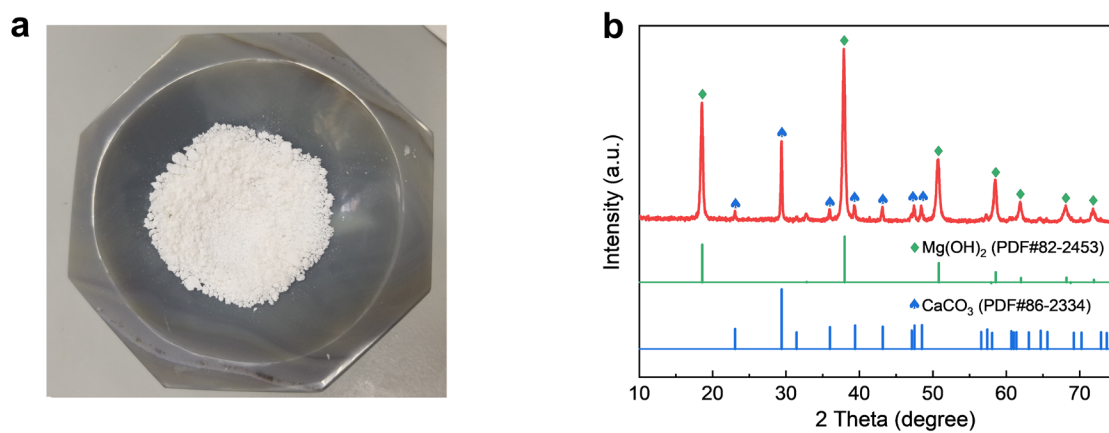

**Fig. S6.** (a) Photograph and (b) XRD pattern of the precipitates obtained by the alkaline treatment of artificial seawater at pH 14.95. The reference patterns of Mg(OH)<sub>2</sub> and CaCO<sub>3</sub> are shown for comparison.

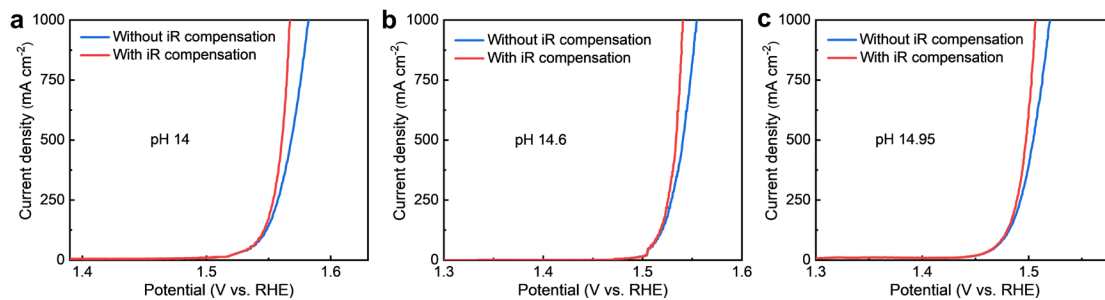

**Fig. S7.** The OER polarization curves of NiCoFe-Bi catalyst with and without iR correction in alkaline artificial seawater with Fe(II) ions at pH 14, 14.6, and 14.95, respectively.

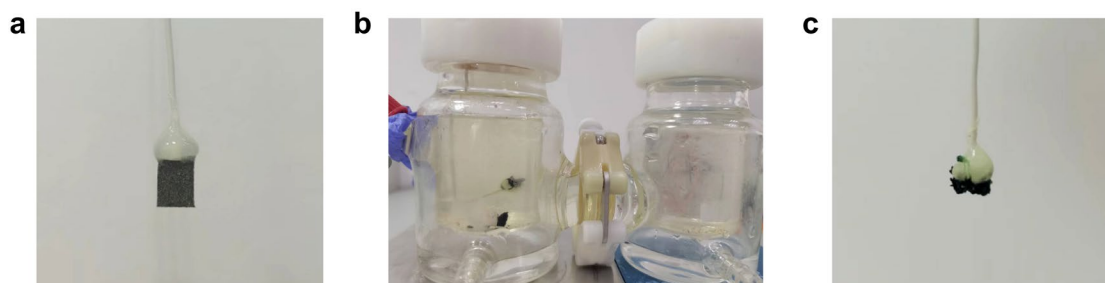

**Fig. S8.** Photographs of NiCoFe-Bi/NF electrode: (a) as-prepared; (b, c) after stability test at  $500 \text{ mA cm}^{-2}$  for 15 h in artificial seawater at pH 14 with 0.05 mM Fe(II) ions.

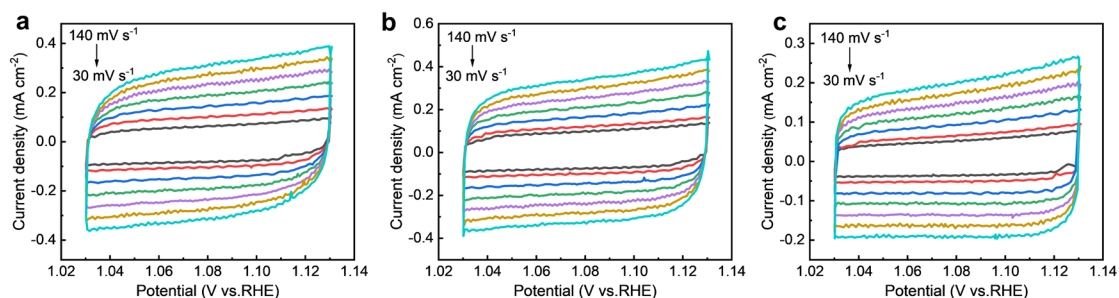

**Fig. S9.** The cyclic voltammetry (CV) curves measured at different scan rates in the potential range of the non-Faraday region (1.02 V ~ 1.14 V vs. RHE). (a) The as-deposited NiCoFe-B<sub>i</sub> catalyst in artificial seawater at pH 14.95 with 0.5 mM Fe(II) ions. (b) After OER test at 500 mA cm<sup>-2</sup> for 100 h in artificial seawater at pH 14.95 with 0.5 mM Fe(II) ions. (c) NiCoFe-B<sub>i</sub> catalyst in artificial seawater at pH 14.95 without the addition of Fe(II) ions.

Calculation of ECSA for the NiCoFe-B<sub>i</sub> catalyst:

$$\text{ECSA} = C_{dl}/C_s$$

With the addition of 0.5 mM Fe(II) ions:

$$\text{ECSA} = 4.33 \text{ mF cm}^{-2}/40 \text{ } \mu\text{F cm}^{-2} = 108.25 \text{ cm}^{-2} \text{ (as-deposited)}$$

$$\text{ECSA} = 4.53 \text{ mF cm}^{-2}/40 \text{ } \mu\text{F cm}^{-2} = 113.25 \text{ cm}^{-2} \text{ (post-OER)}$$

Without the addition of Fe(II) ions:

$$\text{ECSA} = 2.81 \text{ mF cm}^{-2}/40 \text{ } \mu\text{F cm}^{-2} = 70.25 \text{ cm}^{-2}$$

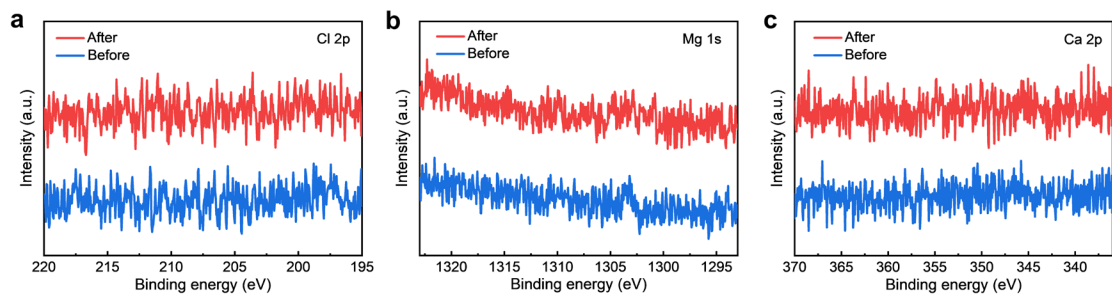

**Fig. S10.** Core-level XPS spectra of the NiCoFe-B<sub>i</sub> catalyst before and after the stability test at 500 mA cm<sup>-2</sup> for 100 h in artificial seawater at pH 14.95 with 0.5 mM Fe(II) ions: (a) Cl 2p, (b) Mg 1s, and (c) Ca 2p.

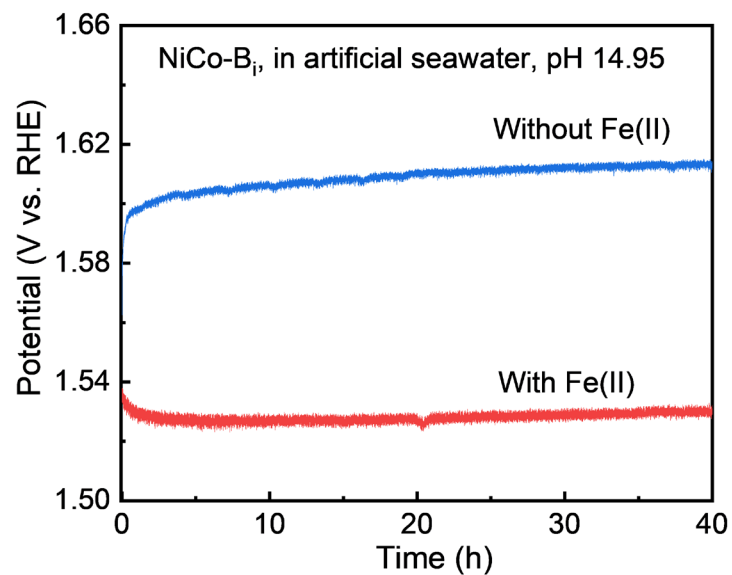

**Fig. S11.** Chronopotentiometry curves of NiCo-Bi catalyst measured at  $500 \text{ mA cm}^{-2}$  for 40 h in artificial seawater at pH 14.95 with and without the addition of Fe(II) ions.

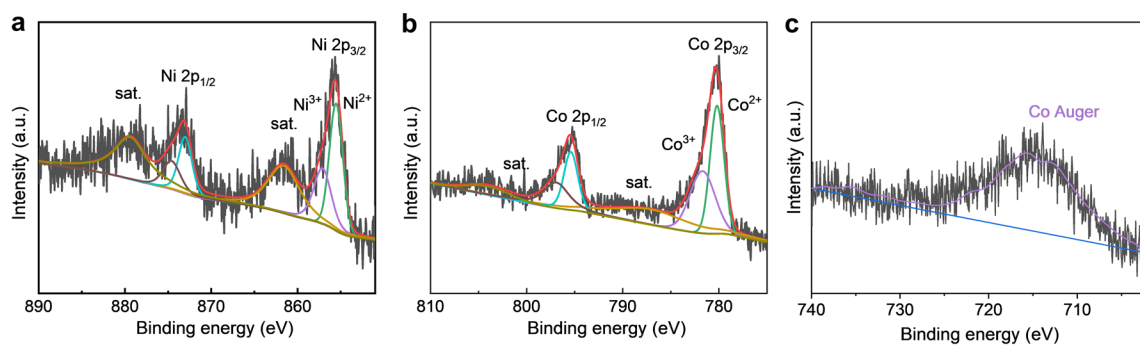

**Fig. S12.** Core-level XPS spectra of the NiCoFe-B<sub>1</sub> catalyst after the stability test at 500 mA cm<sup>-2</sup> for 60 h in artificial seawater at pH 14.95 without Fe(II) ions: (a) Ni 2*p*, (b) Co 2*p*, and (c) Fe 2*p*. It should be noted that the peak in the Fe 2*p* region can be well-fitted using only the Co Auger reference spectrum (purple line) by the NLLSF function, suggesting there is almost no Fe 2*p* signal.

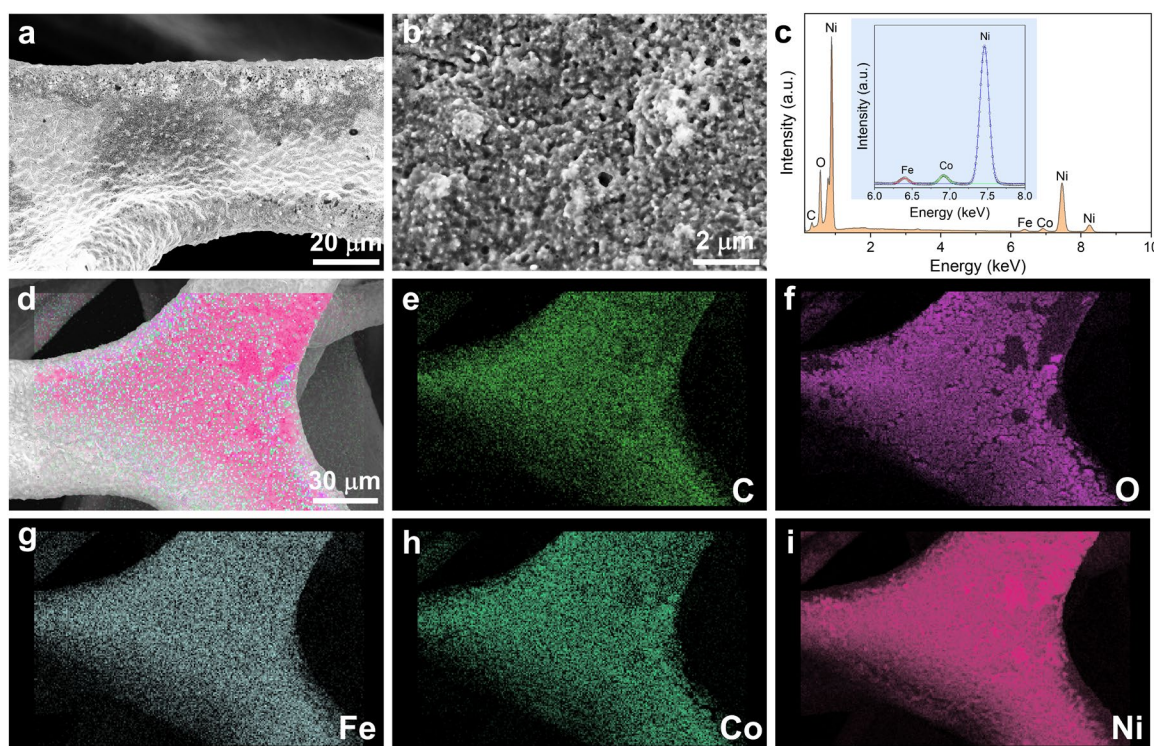

**Fig. S13.** Morphological and compositional characterizations of the NiCoFe-Bi catalyst after stability test at  $500 \text{ mA cm}^{-2}$  for 100 h in artificial seawater at pH 14.95 with 0.5 mM Fe(II) ions. (a, b) SEM images at different magnifications. (c) EDS spectrum, inset shows the  $L\alpha$  lines of Ni, Co, and Fe. (d-i) SEM image of a NiCoFe-Bi layer on NF substrate and the corresponding EDS mappings of C, O, Fe, Co, and Ni elements.



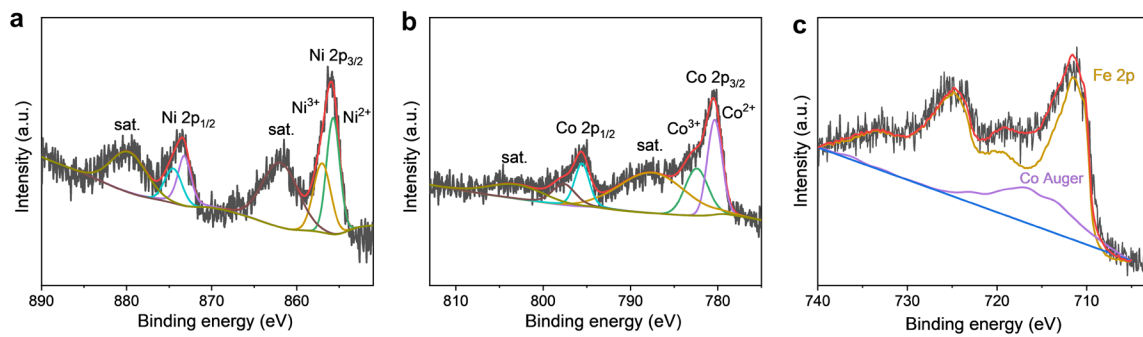

**Fig. S14.** Core-level XPS spectra of the NiCoFe-B<sub>i</sub> catalyst after the stability test at 500 mA cm<sup>-2</sup> for 100 h in artificial seawater at pH 14.95 with 0.5 mM Fe(II) ions: (a) Ni 2*p*, (b) Co 2*p*, and (c) Fe 2*p*.

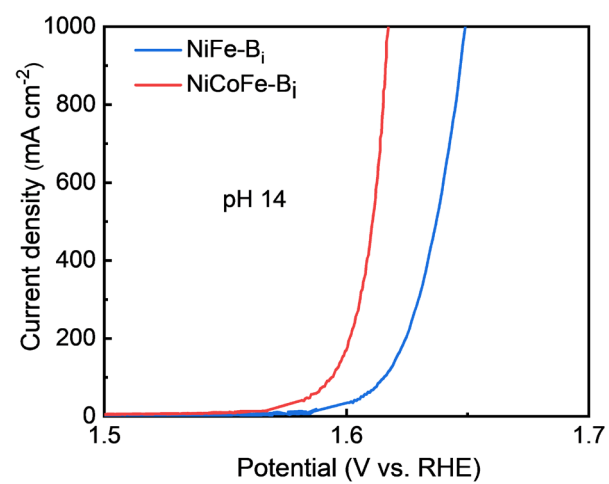

**Fig. S15.** LSV curves of NiFe-B<sub>i</sub> and NiCoFe-B<sub>i</sub> catalysts in artificial seawater at pH 14 with 0.05 mM Fe(II) ions. The OER polarization curves were measured at 10 mV s<sup>-1</sup> scan rate, without iR correction.

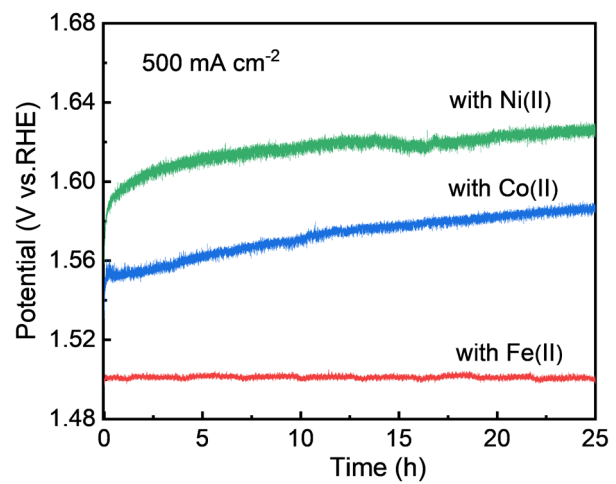

**Fig. S16.** Chronopotentiometry curves of NiCoFe-Bi catalyst measured at 500 mA cm<sup>-2</sup> in artificial seawater (pH 14.95) with the addition of Fe(II), Co(II), or Ni(II) ions.

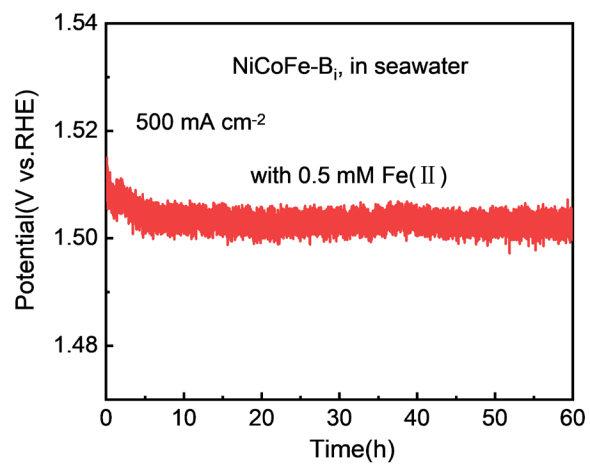

**Fig. S17.** Chronopotentiometry curve of NiCoFe-B<sub>i</sub> catalyst measured at 500 mA cm<sup>-2</sup> for 60 h in artificial seawater at pH 14.95 without adding additional borate ions.

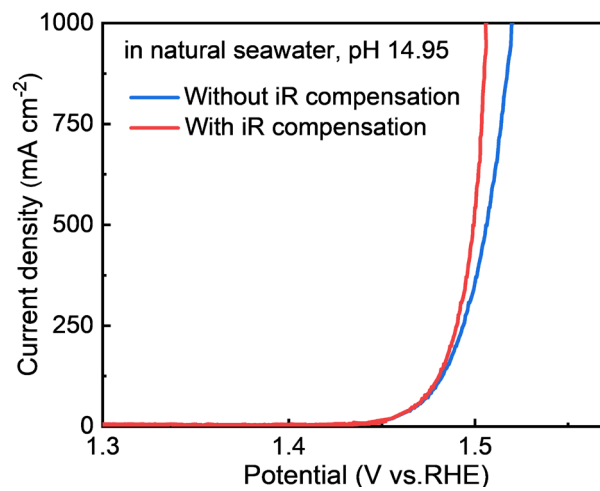

**Fig. S18.** The OER polarization curves of the NiCoFe-Bi catalyst in natural seawater at pH 14.95 with 0.5 mM Fe(II) ions. The curves were measured at 10 mV s<sup>-1</sup> scan rate with and without iR correction.

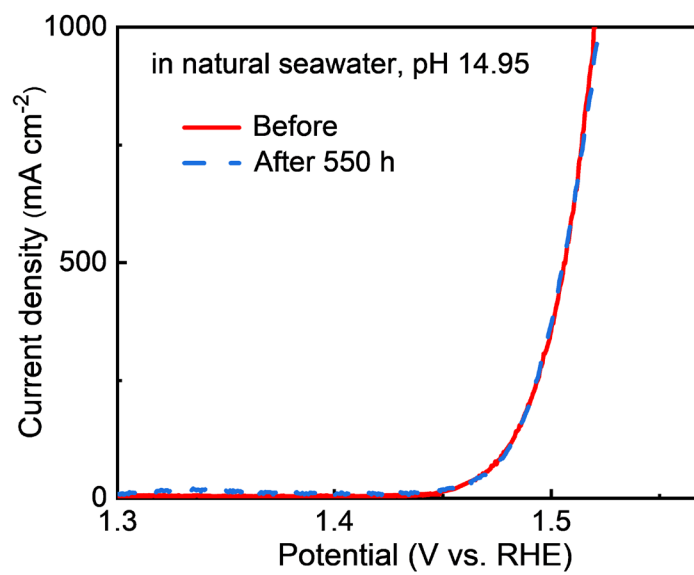

**Fig. S19.** The OER polarization curves of the NiCoFe-Bi catalyst before and after 550 h stability test at 500 mA cm<sup>-2</sup> in natural seawater at pH 14.95 with 0.5 mM Fe(II) ions. The curves were measured at 10 mV s<sup>-1</sup> scan rate, without iR correction.

**Table S1.** Chemical composition of artificial seawater prepared according to the Standard Practice for Preparation of Substitute Ocean Water (ASTM D1141-98)

| <b>Compound</b>                      | <b>Concentration, g/L</b> |
|--------------------------------------|---------------------------|
| NaCl                                 | 24.5586                   |
| MgCl <sub>2</sub> ·6H <sub>2</sub> O | 11.3388                   |
| CaCl <sub>2</sub>                    | 1.1947                    |
| Na <sub>2</sub> SO <sub>4</sub>      | 4.1354                    |
| KCl                                  | 0.6953                    |
| NaHCO <sub>3</sub>                   | 0.2020                    |
| KBr                                  | 0.1016                    |
| H <sub>3</sub> BO <sub>3</sub>       | 0.0273                    |
| SrCl <sub>2</sub> ·6H <sub>2</sub> O | 0.0424                    |
| NaF                                  | 0.0031                    |

**Table S2.** Quantitative XPS analysis results of the atomic concentrations of Fe, Co, and Ni elements in the as-deposited NiCoFe-Bi catalyst and after the OER test in artificial seawater (pH 14.95, with 0.5 mM Fe(II) ions) at 500 mA cm<sup>-2</sup> for 100 h.

|                | Element | Line | Area    | ASF   | Area/ASF | Atomic conc. (%) |
|----------------|---------|------|---------|-------|----------|------------------|
| As-deposited   | Fe      | 2p   | 12488.8 | 2.957 | 4223.5   | 34.4             |
|                | Co      | 2p   | 17114.9 | 3.590 | 4767.4   | 38.9             |
|                | Ni      | 2p   | 13246.4 | 4.044 | 3275.6   | 26.7             |
| After OER test | Fe      | 2p   | 16719.9 | 2.957 | 5654.3   | 44.3             |
|                | Co      | 2p   | 13443.5 | 3.590 | 3744.7   | 29.3             |
|                | Ni      | 2p   | 13603.9 | 4.044 | 3364.0   | 26.4             |



**Table S3.** The concentration of Mg and Ca elements (ppm) in artificial seawater before and after alkaline treatment at pH 14.95.

|                    | <b>Mg</b> | <b>Ca</b> |
|--------------------|-----------|-----------|
| Untreated          | 1314      | 417.6     |
| Alkaline treatment | 0.43      | 6.16      |

The concentration of Mg and Ca elements (ppm) of untreated artificial seawater was calculated from the amount of MgCl<sub>2</sub> and CaCl<sub>2</sub> used to prepare the artificial seawater according to ASTM D1141-98 (Table S1), while the values after alkaline treatment at pH 14.95 were obtained by ICP-OES analysis.

**Table S4.** Fitted parameters of the EIS Nyquist plots of NiCoFe-Bi/NF electrodes tested in different electrolyte conditions.

| <b>Electrolyte conditions</b>                        | <b><math>R_s</math> (<math>\Omega</math>)</b> | <b><math>R_{ct}</math> (<math>\Omega</math>)</b> | <b><math>C_{dl}</math> (F)</b> |
|------------------------------------------------------|-----------------------------------------------|--------------------------------------------------|--------------------------------|
| Artificial seawater, pH 14.95,<br>with 0.5 mM Fe(II) | 0.0285                                        | 0.196                                            | 0.0643                         |
| Artificial seawater, pH 14.95,<br>without Fe(II)     | 0.0286                                        | 2.013                                            | 0.0366                         |
| Natural seawater, pH 14.95,<br>with 0.5 mM Fe(II)    | 0.0251                                        | 0.213                                            | 0.1162                         |

**Table S5.** Comparison of the stability of NiCoFe-B<sub>i</sub> catalyst with recently reported OER catalysts for seawater electrolysis.

| Catalyst                                                       | Electrolyte                         | J (mA cm <sup>-2</sup> ) | Testing time (h) | Δη (mV)    | Ref.      |
|----------------------------------------------------------------|-------------------------------------|--------------------------|------------------|------------|-----------|
| NiCoFe-B <sub>i</sub> /NF                                      | Artificial seawater (pH14.95)       | 500                      | 1000             | Negligible | This work |
|                                                                | Natural seawater (pH 14.95)         | 500                      | 550              | Negligible |           |
| Fe-NiSOH                                                       | 1 M KOH + natural seawater          | 500                      | 900              | 49         | 3         |
| NiFe-CuCo LDH                                                  | 1 M KOH + 1.5 M NaCl                | 500                      | 50               | 34         | 4         |
|                                                                | 6 M KOH + natural seawater          | 500                      | 500              | 71         |           |
| Gd-Mn <sub>3</sub> O <sub>4</sub> @CuO-Cu(OH) <sub>2</sub>     | 1 M KOH + natural seawater          | 100                      | 75               | 45         | 5         |
| V-doped CoCr LDH                                               | 1 M KOH + natural seawater          | 20                       | 24               | NA         | 6         |
| CoP <sub>x</sub> @FeOOH                                        | 1 M KOH + natural seawater          | 100                      | 80               | 29         | 7         |
|                                                                |                                     | 500                      | 80               | 70         |           |
| Fe-Ni(OH) <sub>2</sub> /Ni <sub>3</sub> S <sub>2</sub> /NF     | 1 M KOH + 0.5 M NaCl                | 100                      | 27               | ~15        | 8         |
| Cu@Co-CoO/Rh                                                   | 1 M KOH + 0.5 NaCl                  | 10                       | 10               | NA         | 9         |
| Ni <sub>3</sub> S <sub>2</sub> /Co <sub>3</sub> S <sub>4</sub> | 1 M KOH + natural seawater          | 100                      | 10               | NA         | 10        |
| Ni <sub>2</sub> P-Fe <sub>2</sub> P/NF                         | 1 M KOH + natural seawater          | 100                      | 36               | 18         | 11        |
|                                                                |                                     | 500                      | 24               | 52         |           |
| Ni-doped FeOOH/NF                                              | 1 M KOH + 0.5 M NaCl                | 100                      | 80               | ~25        | 12        |
| NiFe LDH/NiS                                                   | 1 M KOH + 0.5 M NaCl                | 400                      | 24               | NA         | 13        |
| NiFe LDH                                                       | 1 M KOH + natural seawater          | 500                      | 96               | NA         | 14        |
| NiFe/NiFeB <sub>x</sub>                                        | 30 wt% KOH electrolyte + 0.5 M NaCl | 100                      | 125              | NA         | 15        |
| B-Co <sub>2</sub> Fe LDH                                       | 1 M KOH + natural seawater          | 100                      | 100              | 46         | 16        |
|                                                                |                                     | 500                      | 100              | 65         |           |
| S-Ni/Fe(OOH)/NF                                                | 1 M KOH + natural seawater          | 100                      | 100              | NA         | 17        |
|                                                                | 1 M KOH + 1 M NaCl                  | 100                      | 100              | NA         |           |
| GO@Fe@Ni-Co/NF                                                 | 1 M KOH + 0.5 M NaCl                | 1000                     | 12               | ~130       | 18        |
| Fe <sub>0.01</sub> -Ni&Ni <sub>0.2</sub> Mo <sub>0.8</sub> N   | 6 M KOH + natural seawater          | 1000                     | 80               | NA         | 19        |
| NiCoFeP                                                        | 6 M KOH + 2.8 M NaCl                | 500                      | 100              | NA         | 20        |

## SI References

1. Y. Kuang, M. J. Kenney, Y. Meng, W. H. Hung, Y. Liu, J. E. Huang, R. Prasanna, P. Li, Y. Li, L. Wang, M. C. Lin, M. D. McGehee, X. Sun and H. Dai, Solar-driven, highly sustained splitting of seawater into hydrogen and oxygen fuels, *Proc. Natl. Acad. Sci. U. S. A.*, 2019, **116**, 6624-6629.
2. L. Yu, Q. Zhu, S. Song, B. McElhenny, D. Wang, C. Wu, Z. Qin, J. Bao, Y. Yu, S. Chen and Z. Ren, Non-noble metal-nitride based electrocatalysts for high-performance alkaline seawater electrolysis, *Nat. Commun.*, 2019, **10**, 5106.
3. C. Huang, Q. Zhou, D. Duan, L. Yu, W. Zhang, Z. Wang, J. Liu, B. Peng, P. An, J. Zhang, L. Li, J. Yu and Y. Yu, The rapid self-reconstruction of Fe-modified Ni hydroxysulfide for efficient and stable large-current-density water/seawater oxidation, *Energy Environ. Sci.*, 2022, **15**, 4647-4658.
4. L. Yu, J. Xiao, C. Huang, J. Zhou, M. Qiu, Y. Yu, Z. Ren, C. W. Chu and J. C. Yu, High-performance seawater oxidation by a homogeneous multimetallic layered double hydroxide electrocatalyst, *Proc. Natl. Acad. Sci. U. S. A.*, 2022, **119**, 2202382119.
5. T. Ul Haq, S. Mansour and Y. Haik, Electronic and structural modification of Mn<sub>3</sub>O<sub>4</sub> nanosheets for selective and sustained seawater oxidation, *ACS Appl. Mater. Interfaces*, 2022, **14**, 20443-20454.
6. S. Khatun and P. Roy, Cobalt chromium vanadium layered triple hydroxides as an efficient oxygen electrocatalyst for alkaline seawater splitting, *Chem. Commun. (Camb)*, 2022, **58**, 1104-1107.
7. L. Wu, L. Yu, B. McElhenny, X. Xing, D. Luo, F. Zhang, J. Bao, S. Chen and Z. Ren, Rational design of core-shell-structured CoP<sub>x</sub>@FeOOH for efficient seawater electrolysis, *Appl. Catal., B*, 2021, **294**, 120256.
8. B. Cui, Z. Hu, C. Liu, S. Liu, F. Chen, S. Hu, J. Zhang, W. Zhou, Y. Deng, Z. Qin, Z. Wu, Y. Chen, L. Cui and W. Hu, Heterogeneous lamellar-edged Fe-Ni(OH)<sub>2</sub>/Ni<sub>3</sub>S<sub>2</sub> nanoarray for efficient and stable seawater oxidation, *Nano Research*, 2020, **14**, 1149-1155.
9. P. K. L. Tran, D. T. Tran, D. Malhotra, S. Prabhakaran, D. H. Kim, N. H. Kim and J. H. Lee, Highly effective freshwater and seawater electrolysis enabled by atomic Rh-Modulated Co-CoO lateral heterostructures, *Small*, 2021, **17**, 2103826.
10. C. Wang, M. Zhu, Z. Cao, P. Zhu, Y. Cao, X. Xu, C. Xu and Z. Yin, Heterogeneous bimetallic sulfides based seawater electrolysis towards stable industrial-level large current density, *Appl. Catal., B*, 2021, **291**, 120071.
11. L. Wu, L. Yu, F. Zhang, B. McElhenny, D. Luo, A. Karim, S. Chen and Z. Ren, Heterogeneous bimetallic phosphide Ni<sub>2</sub>P-Fe<sub>2</sub>P as an efficient bifunctional catalyst for water/seawater splitting, *Adv. Funct. Mater.*, 2020, **31**, 2006484.
12. Y. S. Park, J. Lee, M. J. Jang, J. Yang, J. Jeong, J. Park, Y. Kim, M. H. Seo, Z. Chen and S. M. Choi, High-performance anion exchange membrane alkaline seawater electrolysis, *J. Mater. Chem. A*, 2021, **9**, 9586-9592.
13. Q. Wen, K. Yang, D. Huang, G. Cheng, X. Ai, Y. Liu, J. Fang, H. Li, L. Yu and T. Zhai, Schottky heterojunction nanosheet array achieving high-current-density oxygen evolution for industrial water splitting electrolyzers, *Adv. Energy Mater.*, 2021, **11**, 2102353.
14. M. Ning, L. Wu, F. Zhang, D. Wang, S. Song, T. Tong, J. Bao, S. Chen, L. Yu and Z. Ren, One-step spontaneous growth of NiFe layered double hydroxide at room temperature for seawater oxygen evolution, *Mater. Today Phys.*, 2021, **19**, 100419.
15. J. Li, Y. Liu, H. Chen, Z. Zhang and X. Zou, Design of a multilayered oxygen-evolution electrode with high catalytic activity and corrosion resistance for saline water splitting, *Adv. Funct. Mater.*, 2021, **31**, 2101820.
16. L. Wu, L. Yu, Q. Zhu, B. McElhenny, F. Zhang, C. Wu, X. Xing, J. Bao, S. Chen and Z. Ren, Boron-modified cobalt iron layered double hydroxides for high efficiency seawater oxidation, *Nano Energy*, 2021, **83**, 105838.
17. L. Yu, L. Wu, B. McElhenny, S. Song, D. Luo, F. Zhang, Y. Yu, S. Chen and Z. Ren, Ultrafast room-temperature synthesis of porous S-doped Ni/Fe (oxy)hydroxide electrodes for oxygen evolution catalysis in seawater splitting, *Energy Environ. Sci.*, 2020, **13**, 3439-3446.
18. R. Jadhav, A. Kumar, J. Lee, T. Yang, S. Na, J. Lee, Y. Luo, X. Liu, Y. Hwang, Y. Liu and H. Lee, Stable complete seawater electrolysis by using interfacial chloride ion blocking layer on catalyst surface, *J. Mater. Chem. A*, 2020, **8**, 24501-24514.
19. M. Ning, F. Zhang, L. Wu, X. Xing, D. Wang, S. Song, Q. Zhou, L. Yu, J. Bao, S. Chen and Z. Ren, Boosting efficient alkaline fresh water and seawater electrolysis via electrochemical reconstruction, *Energy Environ. Sci.*, 2022, **15**, 3945-3957.
20. P. Li, S. Wang, I. A. Samo, X. Zhang, Z. Wang, C. Wang, Y. Li, Y. Du, Y. Zhong, C. Cheng, W. Xu, X. Liu, Y. Kuang, Z. Lu and X. Sun, Common-ion effect triggered highly sustained seawater electrolysis with additional NaCl production, *Research*, 2020, **2020**, 2872141.
